# Supplementary material for: Fabrication of “strong” columnar Cu2−xSe superstructures assisted by inorganic ligands
Source: Royal Society of Chemistry journal article supplement (doi:10.1039/c2nr00057a), 2012-01-01
Supplement: c2nr00057a.pdf [file c2nr00057a.pdf]

**Supporting Information:**

**Fabrication of “Strong” Columnar Cu<sub>2-x</sub>Se Superstructures  
Assisted by Inorganic Ligands**

*Huaibin Shen<sup>1</sup>, Jinzhong Niu<sup>1,3</sup>, Xiaomin Li<sup>1</sup>, Hongzhe Wang<sup>1</sup>, Ming Xing<sup>2</sup>, Xia Chen,<sup>2\*</sup> and Lin Song Li<sup>1\*</sup>*

<sup>1</sup>Key Laboratory for Special Functional Materials, Henan University, Kaifeng 475004, P. R. China;

<sup>2</sup> College of Life Science, Jilin University, Changchun, 130021, P. R. China

<sup>3</sup> Department of Mathematical and Physical Sciences, Henan Institute of Engineering, Zhengzhou, 451191, P. R. China,

E-mail: lsli@henu.edu.cn, bbbbz@163.com

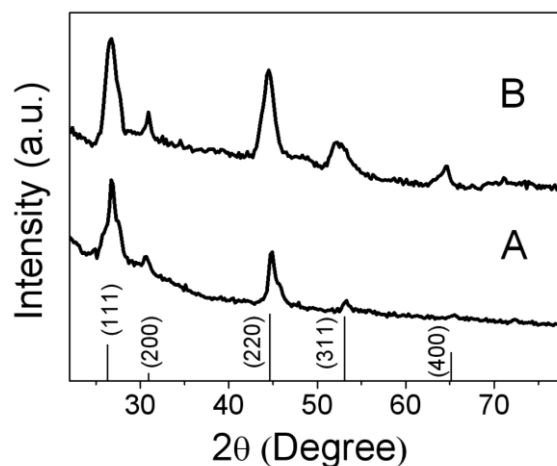

**Figure S1.** XRD patterns of as-synthesized Cu<sub>2-x</sub>Se nanoplates with (A) and without (B) the precipitation of Sn-X complex.
